# Supplementary material for: CpG island density and its correlations with genomic features in mammalian genomes
Source: Springer Nature journal article supplement (doi:10.1186/gb-2008-9-5-r79), 2008-05-13

**Figure S2** Correlations between **Intergenic CGI** density and genomic features in 9 mammalian genomes **(A)** Intergenic CGI density (per Mb) vs. number of chromosome pairs. **(B)** Intergenic CGI density (per Mb) vs.  $\log_{10}$ (chromosome size). **(C)** Intergenic CGI density (per Mb) vs. chromosome GC content (%). **(D)** Intergenic CGI density (per Mb) vs. chromosome  $\text{Obs}_{\text{CpG}}/\text{Exp}_{\text{CpG}}$ .

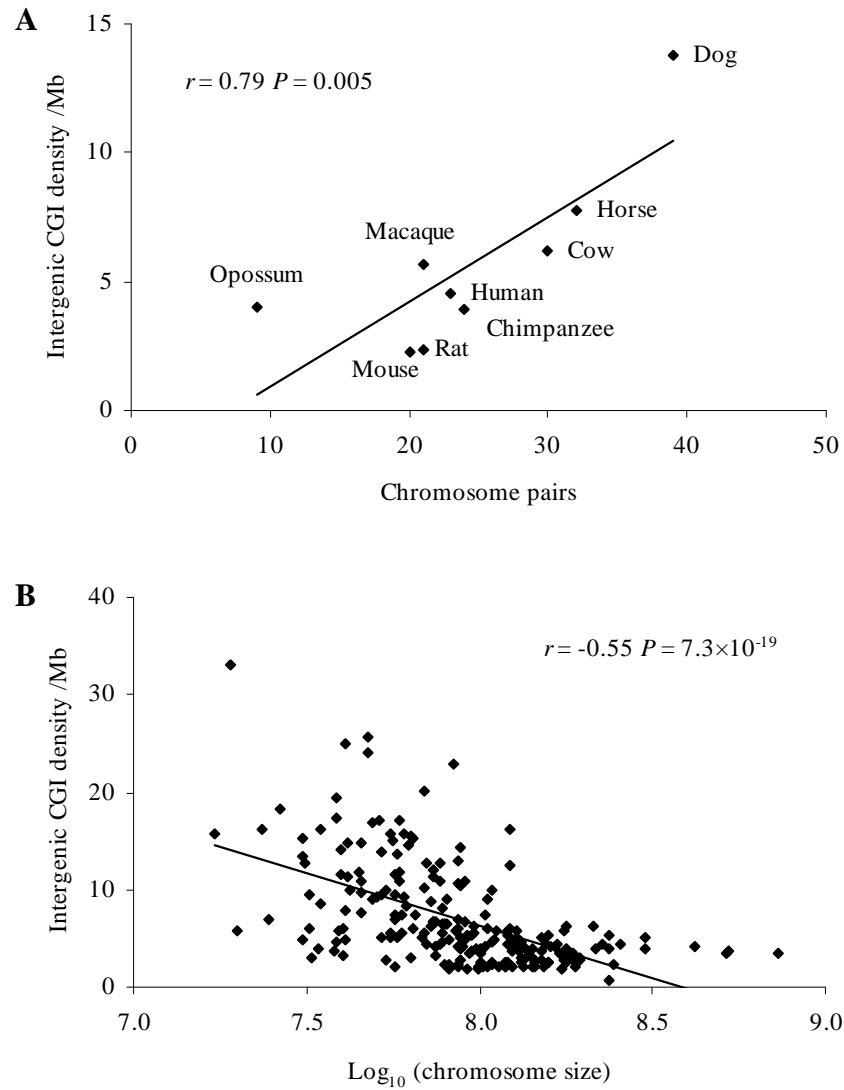

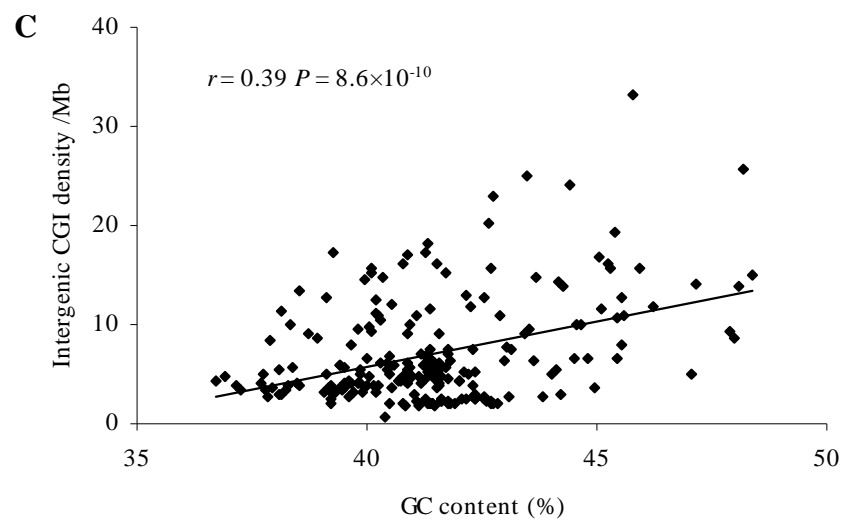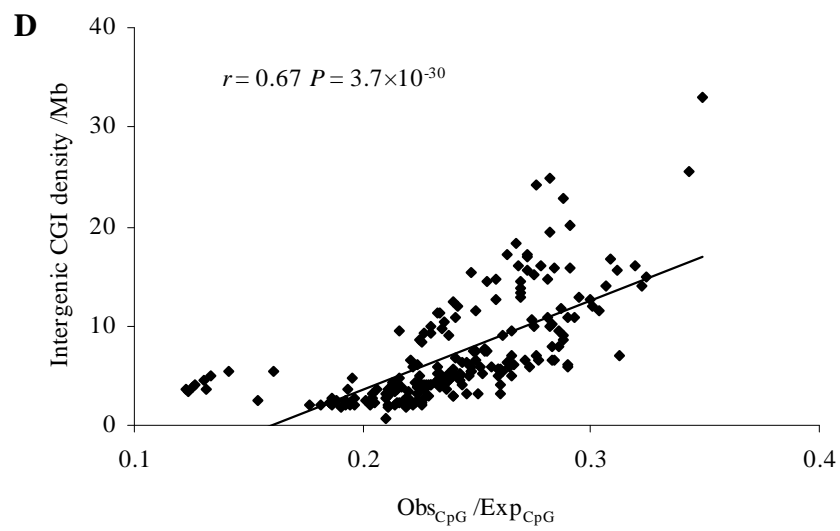

Supplement: Additional file 3 [file gb-2008-9-5-r79-s3.pdf]
