# Supplementary material for: CpG island density and its correlations with genomic features in mammalian genomes
Source: Springer Nature journal article supplement (doi:10.1186/gb-2008-9-5-r79), 2008-05-13

**Figure S3** CGI density (per Mb) vs. recombination rate (cM/Mb) in **(A)** humans (1-Mb window), **(B)** humans (10-Mb window), **(C)** mice (5-Mb window), **(D)** mice (10-Mb window), **(E)** rats (5-Mb window), and **(F)** rats (10-Mb window). The correlation coefficients are summarized in Table 3. The data in **A** were based on the deCODE genetic map and downloaded from the UCSC Genome Browser. The data in **B-F** were prepared by Jensen-Seaman et al. (2004).

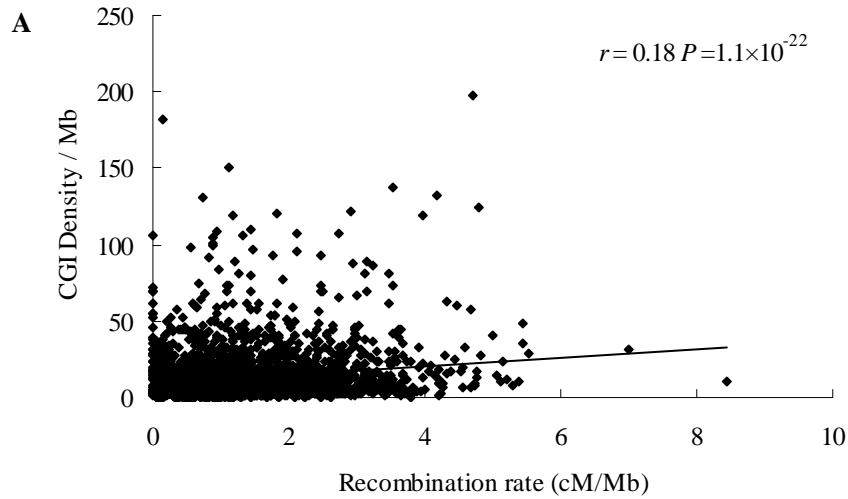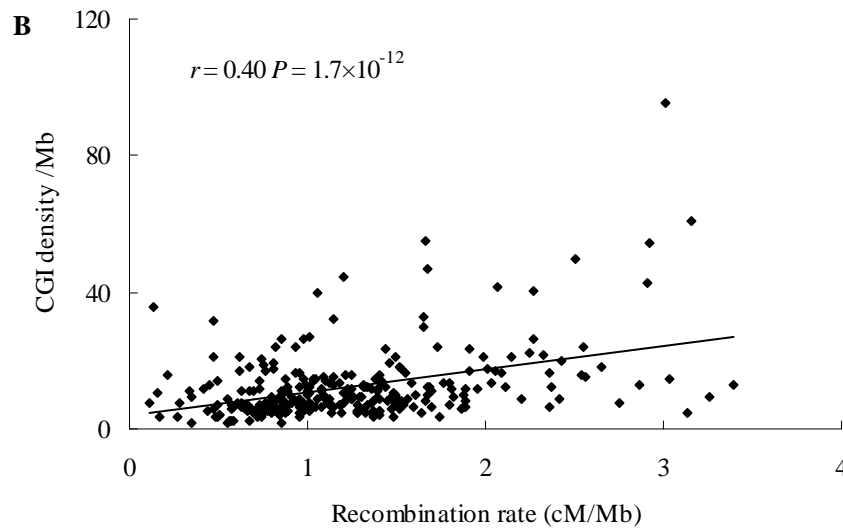

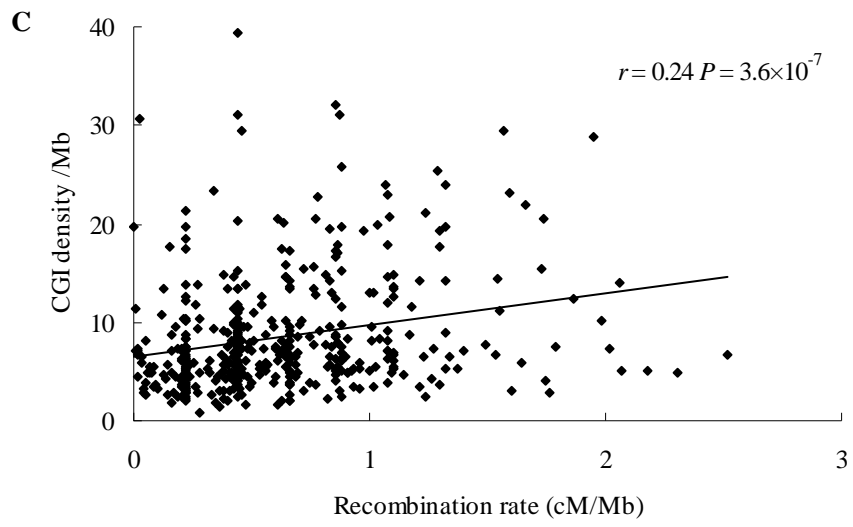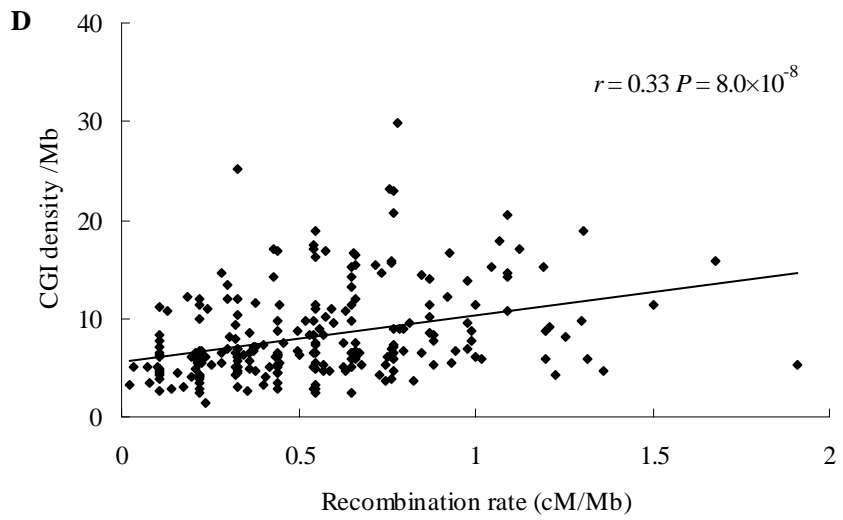

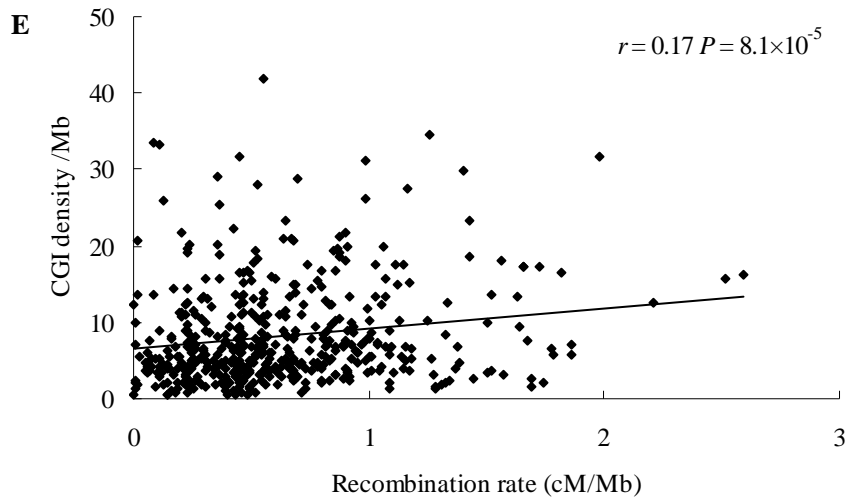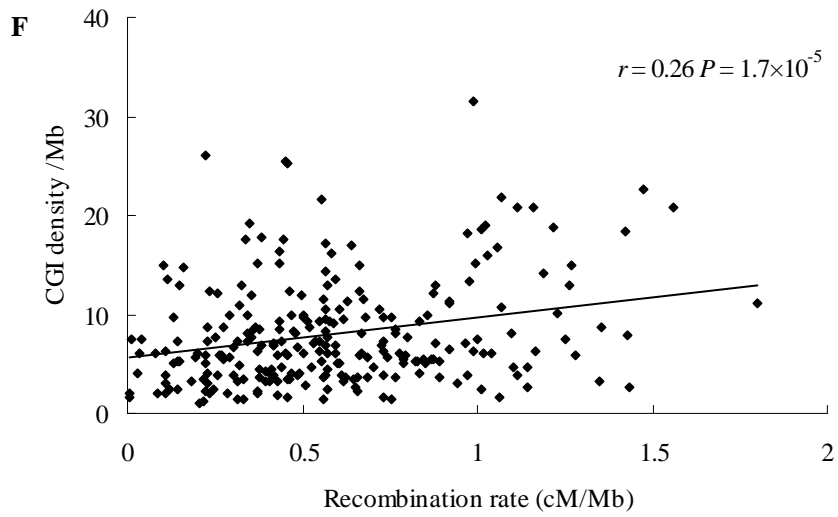

Supplement: Additional file 4 [file gb-2008-9-5-r79-s4.pdf]
