# Supplementary material for: CpG island density and its correlations with genomic features in mammalian genomes
Source: Springer Nature journal article supplement (doi:10.1186/gb-2008-9-5-r79), 2008-05-13

**Figure S5** Correlations between CGI density and genomic features in 9 mammalian genomes. CGIs were identified by **Gardiner-Garden and Frommer's** (1987) algorithm in the non-repeat portions of genomes. The platypus chromosomes were excluded because of incomplete genome sequence data and chromosome data. The conclusion would be the same when the platypus data were included. **(A)** CGI density (per Mb) vs. number of chromosome pairs. **(B)** CGI density (per Mb) vs.  $\log_{10}$ (chromosome size). **(C)** CGI density (per Mb) vs. chromosome GC content (%). **(D)** CGI density (per Mb) vs. chromosome  $\text{Obs}_{\text{CpG}}/\text{Exp}_{\text{CpG}}$ .

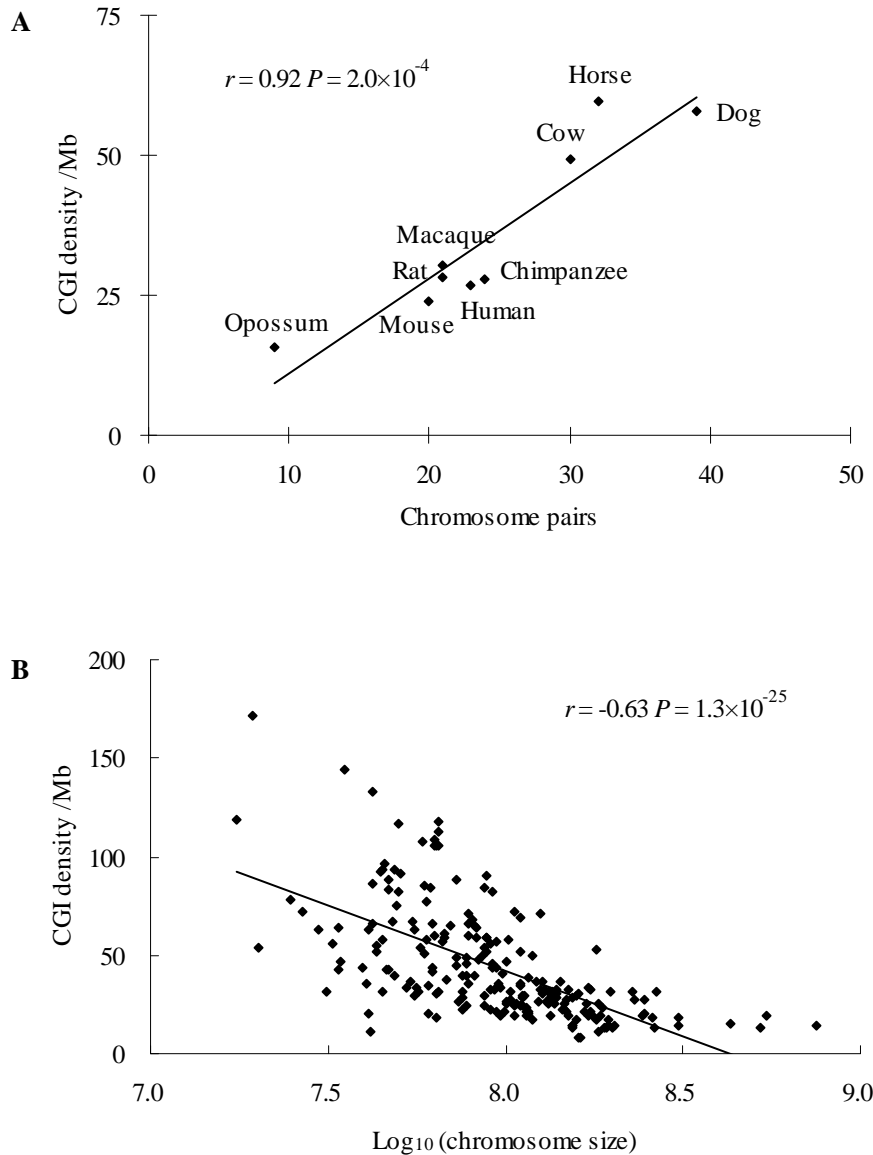

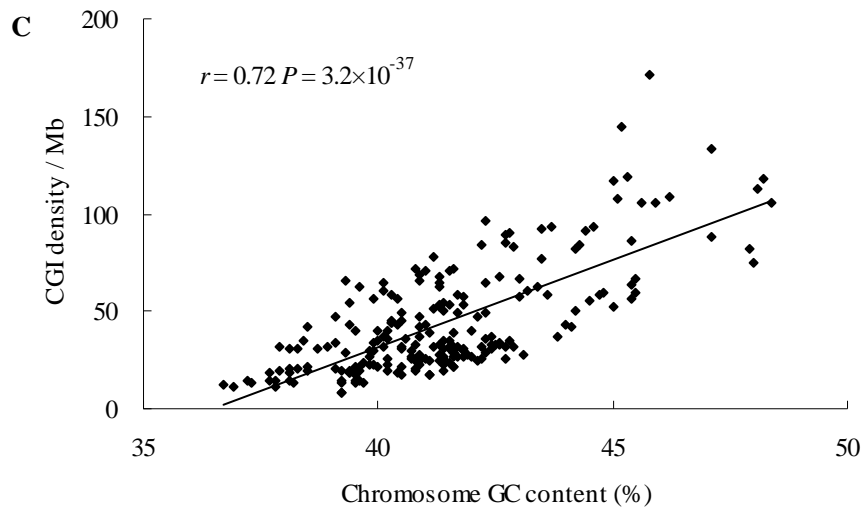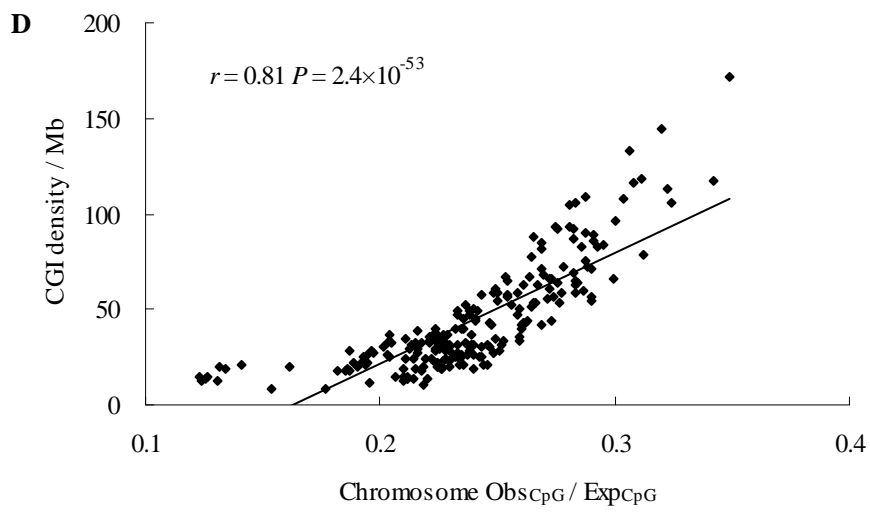

Supplement: Additional file 6 [file gb-2008-9-5-r79-s6.pdf]
